# Supplementary material
Source: Springer Nature journal article supplement (https://www.springermedizin.de/resource/supplementary/12916_2010_359_MOESM1_ESM.pdf/9599704)
Supplement: MOESM1 [file 9599704]

**RANDOMIZATION**

Randomized n=909

Eligible n=873

**Arm A: LV + 5FU + irinotecan**

Allocated to intervention (n=441)

Received allocated intervention (n=423)

Did not receive allocated intervention (n=18)

*Reasons:*      Lost files (n=8)  
                    Never starters (n=6)  
                    Received intervention of  
                    Group B (n=4)

**Arm B: LV + 5FU**

Allocated to intervention (n=432)

Received allocated intervention (n=414)

Did not receive allocated intervention (n=18)

*Reasons:*      Lost files (n=6)  
                    Never starters (n=8)  
                    Received intervention of  
                    Group A (n=4)

Completion (n=350)

Discontinued intervention (n=77)

*Reasons:*      Death (n=3)  
                    Non-fatal toxicity (n=14)  
                    Doctor's decision (n=4)  
                    Progression (n=5)  
                    Voluntary withdrawal (n=30)  
                    Other (n=16)  
                    Unknown (n=5)

Completion (n=347)

Discontinued intervention (n=71)

*Reasons:*      Death (n=3)  
                    Non-fatal toxicity (n=10)  
                    Doctor's decision (n=2)  
                    Progression (n=10)  
                    Voluntary withdrawal (n=31)  
                    Other (n=9)  
                    Unknown (n=6)

Dead (n=118)

Still on follow-up (n=311)

Lost to follow-up\* (n=12)

Dead (n=128)

Still on follow-up (n=297)

Lost to follow-up\* (n=7)
